# 1 **Temporal and spatial limitations in global surveillance for bat filoviruses and** 2 **henipaviruses**

3

4 Daniel J. Becker<sup>1-3\*</sup>, Daniel E. Crowley<sup>1</sup>, Alex D. Washburne<sup>1</sup>, Raina K. Plowright<sup>1</sup>

5

6 <sup>1</sup>Department of Microbiology and Immunology, Montana State University, Bozeman, Montana

7 <sup>2</sup>Center for the Ecology of Infectious Diseases, University of Georgia, Athens, Georgia

8 <sup>3</sup>Department of Biology, Indiana University, Bloomington, Indiana

9 \*[danbeck@iu.edu](mailto:danbeck@iu.edu)

10

11 **Running head:** Spatiotemporal bat virus dynamics

12 **Keywords:** Chiroptera; spillover; sampling design; zoonotic virus; phylogenetic meta-analysis;  
13 Hendra virus; Marburg virus; Nipah virus

14

## 15 **Abstract**

16 Sampling reservoir hosts over time and space is critical to detect epizootics, predict spillover,  
17 and design interventions. Yet spatiotemporal sampling is rarely performed for many reservoir  
18 hosts given high logistical costs and potential tradeoffs between sampling over space and time.  
19 Bats in particular are reservoir hosts of many virulent zoonotic pathogens such as filoviruses and  
20 henipaviruses, yet the highly mobile nature of these animals has limited optimal sampling of bat  
21 populations across both space and time. To quantify the frequency of temporal sampling and to  
22 characterize the geographic scope of bat virus research, we here collated data on filovirus and  
23 henipavirus prevalence and seroprevalence in wild bats. We used a phylogenetically controlled  
24 meta-analysis to next assess temporal and spatial variation in bat virus detection estimates. Our  
25 analysis demonstrates that only one in five studies sample bats longitudinally, that bat sampling  
26 efforts cluster geographically (e.g., filovirus data are available across much of Africa and Asia  
27 but are absent from Latin America and Oceania), and that reporting trends may affect some viral  
28 detection estimates (e.g., filovirus seroprevalence). Within the limited number of longitudinal bat  
29 virus studies, we observed high spatiotemporal variation. This suggests spatiotemporal sampling  
30 designs are essential to understand how zoonotic viruses are maintained and spread within and  
31 across wild bat populations, which in turn could help predict and preempt risks of viral spillover.

## 32 Introduction

33 Risks of pathogen spillover vary across time and space [1,2], in part because pathogen shedding  
34 from reservoir hosts is a dynamic spatiotemporal processes [3,4]. Metapopulation dynamics  
35 characterize many reservoir hosts [5], where connectivity among populations can determine the  
36 spatiotemporal distribution of a pathogen [6,7] and the degree of spatial synchrony (i.e.,  
37 correlated fluctuations in time) structuring infection dynamics [8]. For example, panmixia of  
38 straw-colored fruit bats (*Eidolon helvum*) across Africa likely facilitates the widespread  
39 circulation of Lagos bat virus and henipaviruses [9]. Temporal pulses in infection prevalence  
40 driven by seasonality in birth, movement, and climate are also common across reservoir hosts  
41 [10,11]. Understanding how infection prevalence or intensity in reservoir hosts varies over space  
42 and time is thus a critical need for predicting and managing emerging infectious disease risks.

43 However, surveillance strategies for reservoir hosts often do not sample this underlying  
44 spatiotemporal process, as spatially and temporally explicit sampling designs present logistical  
45 challenges when studying mobile and gregarious species [3,12,13]. For many such hosts (e.g.,  
46 wild birds and bats), surveillance is often opportunistic (e.g., outbreak responses) or relies on  
47 convenience sampling [14]. These non-probabilistic samples and often singular sampling events  
48 cannot characterize spatial and temporal fluctuations in infection; times or locations of high  
49 infection prevalence can be over- or under-represented, and lack of probabilistic sampling can  
50 result in non-randomly missing data [3,15]. These challenges to inference cannot be simply fixed  
51 with statistical modeling and can accordingly limit and bias estimates of population prevalence  
52 and important epidemiological parameters such as the basic reproductive number [14,16].

53 Given a fixed cost, difficult decisions must be made about how to allocate sampling  
54 efforts. Sampling over space facilitates detecting geographic clusters of disease and predictive  
55 risk mapping [17,18], while sampling over time can identify periods of intensive pathogen  
56 shedding and enable epidemiological inference about the dominant transmission routes within a  
57 reservoir host population [19,20]. Researchers often treat this as a tradeoff between sampling  
58 intensively over either time or space, rather than allocating effort to both [21]. The trend to  
59 sample populations at either one point in space and time or for trading off between spatial or  
60 temporal resolution likely reflects broader sampling limitations within ecology [22,23]. Yet  
61 implicit here is that the temporal component is constant over space or that the spatial component  
62 is constant over time, and such sampling designs result in no data to assess this assumption.

63 We here quantified the temporal and spatial data limitations for two taxa of high-profile  
64 zoonotic viruses of bats: the family *Filoviridae* and genus *Henipavirus*. Bats have been widely  
65 studied as reservoirs for zoonotic pathogens and host more zoonotic viruses than other mammals  
66 [24,25]. Bat species such as *Pteropus alecto* and *Rousettus aegyptiacus* have been confirmed as  
67 reservoirs for several henipaviruses (i.e., Hendra virus and Nipah virus) and Marburg virus,  
68 respectively [26,27], with bats implicated as reservoir hosts for other viruses within these taxa  
69 [28–32]. Many filoviruses and henipaviruses are shed from bats into the environment [33,34],  
70 and some can cause fatal disease in humans by environmental exposure (e.g., Marburg and  
71 Nipah viruses) or from contact with intermediate hosts such as horses or pigs (e.g., Hendra and  
72 Nipah viruses) [35–38]. Current evidence suggests that many filoviruses and henipaviruses show  
73 variable dynamics in space and time, including pulses of excretion from bats [6,30,35,39,40],  
74 which implies that spatiotemporal sampling is critical to capture viral dynamics in bat reservoirs.  
75 Yet while past efforts have focused on bat virus discovery [41], determinants of reservoir host  
76 status [42], and experimental mechanisms of viral transmission [33], spatiotemporal studies of

77 bat–virus dynamics are rare [43]. This limits understanding how zoonotic viruses are maintained  
78 and spread within and across bat populations and impairs improving future sampling designs. We  
79 here collated data on prevalence and seroprevalence in wild bats to (i) quantify the frequency of  
80 temporal reporting and (ii) assess the geographic scope of sampling. We next used phylogenetic  
81 meta-analysis to (iii) characterize temporal and spatial variation in virus detection estimates.

82

## 83 **Methods**

84 To systematically identify studies quantifying the proportion of wild bats positive for filoviruses  
85 and henipaviruses using PCR (RNA-based detection) or serology (antibody-based detection), we  
86 searched Web of Science, CAB Abstracts, and PubMed with the following string: (bat\* OR  
87 Chiroptera\*) AND (filovirus OR henipavirus OR 271 "Hendra virus" OR "Nipah virus" OR  
88 "Ebola virus" OR "Marburg virus" OR ebolavirus OR marburgvirus); we supplemented these  
89 searches by extracting data from references cited in identified studies (see Figure S1). Our  
90 dataset included 824 records from 56 studies (see Appendix). Viruses included not only Hendra  
91 virus, Nipah virus, Ebola virus, and Marburg virus but also Lloviu virus and Reston virus. We  
92 grouped viruses by taxa given our sample sizes and issues of serological cross-reactivity [44,45].

93 From each study, we defined sampling subunits: a sampling event of one bat species in  
94 one location per viral outcome. We classified each subunit into one of three sampling designs:  
95 pooled events over time, one sampling event, or multiple events. Records of a single prevalence  
96 or seroprevalence estimate from a bat population sampled over a period longer than one month  
97 were classified as pooled events, while records of virus estimates from a period less than or equal  
98 to one month were classified as single sampling events. Records of a given bat population over  
99 multiple monthly timepoints were classified as representing multiple events (i.e., longitudinal).  
100 For example, every monthly prevalence estimate per population of *Pteropus lylei* in Thailand  
101 would represent a unique sampling subunit, with the sampling design being classified as multiple  
102 events [46]. A conceptual schematic of these three sampling and reporting designs is provided in  
103 Figure 1A. One month was selected given that this timeframe was the lowest common temporal  
104 unit across studies and because bat shedding of these viruses can occur within a month [27,33].  
105 Sampling design data were reported for most records (792/824 subunits; six publications did not  
106 always report temporal dimensions of their viral detection estimates). For each sampling subunit,  
107 we also recorded bat species (or only genus if available), virus taxon, virus detection outcome  
108 (prevalence or seroprevalence), sample size, the proportion of positive bats, sampling location,  
109 and country (recoded to the United Nations geoscheme); where possible, we also included data  
110 or derived viral detection estimates from online supplemental materials from each publication.

111 To assess how sampling and reporting practices relate to virus detection estimates, we  
112 used a phylogenetic meta-analysis to account for bat phylogeny, variable sampling effort, and the  
113 hierarchical nature of our dataset (i.e., subunits nested within studies). We first used the *metafor*  
114 package in R to calculate logit-transformed proportions and sampling variances [47]. We next  
115 used the *rma.mv()* function to fit a mixed-effects model with an interaction between sampling  
116 design, virus detection outcome (prevalence or seroprevalence), and virus taxa [48]. We included  
117 bat phylogeny (derived from the Open Tree of Life using the *rotl* and *ape* packages [49–51]) and  
118 subunit nested within study as random effects, and we used the estimated variance components  
119 to derive  $R^2$  [52,53]. As our models account for bat phylogeny, we excluded subunits that pooled  
120 data across genera ( $n=52$ ). Because some studies pooled data in a genus, we randomly selected  
121 one species from the genus to retain these samples. This dataset included 740 subunits from 48

122 studies and 196 species (Figure S2). To test if detection estimates varied over space and time, we  
123 fit a model with identical random effects to data from studies with multiple events ( $n=150$ ). We  
124 fit an intercept-only model to quantify the contribution of true heterogeneity to total variance ( $I^2$ )  
125 and then included location as a fixed effect to test if viral data varied in longitudinal studies [54].

126

## 127 **Results**

128 Only 21% of bat virus studies reported data longitudinally (5 for filoviruses, 7 for henipaviruses).  
129 Eight studies reported sampling wild bat populations 2–3 times while seven reported sampling  
130 bat populations over four times (Table 1). Half the studies ( $n=28$ ) instead reported estimates  
131 across multiple timepoints as pooled proportions, where the number of days per pooled estimate  
132 ranged from 31–2191 ( $\bar{x}=603$ ,  $SD=456$ ). Bat sampling also showed geographic biases. Whereas  
133 filovirus data were available across much of Africa and Asia, no studies were from Latin  
134 America and Oceania (Figure 1). Although PCR and serology have been conducted per country  
135 for most regions, both diagnostics have not been used together in Europe and Western Africa  
136 (Table 1). Henipavirus sampling was more broadly distributed but was limited in Eastern Asia,  
137 Eastern and Middle Africa, and Europe (Figure 1), where henipavirus studies have not used both  
138 PCR and serology (Table 1). Geography was also associated with bat sampling design ( $\chi^2=172.9$ ,  
139  $p=0.001$ ). Longitudinal data were only reported from Central, Middle, and Eastern Africa for  
140 filoviruses and only reported from Southeastern Asia and Oceania for henipaviruses (Table 1).

141 Our phylogenetic meta-analysis showed that viral detection estimates were associated  
142 with sampling design and reporting, although the effect depended on outcome and virus taxa  
143 (three-way interaction:  $Q_7=21.12$ ,  $p=0.004$ ,  $R^2=0.12$ ). A post-hoc analysis with models fit to each  
144 virus–outcome dataset showed that sampling design was associated with filovirus seroprevalence  
145 ( $Q_2=11.53$ ,  $p=0.003$ ; Figure 2), with pooled detection estimates having the lowest proportions,  
146 likely by increasing zeros in the numerator. Sampling design had weak effects on henipavirus  
147 seroprevalence and no effect on prevalence for either viral taxon (Table S1). We also found high  
148 variation between and within longitudinal studies ( $Q_{149}=1606$ ,  $p<0.0001$ ,  $I^2=92\%$ ; Figure 2).  
149 Study contributed most (53.8%) to residual variance, suggesting high between-region variation.  
150 Yet subunit location was also predictive ( $Q_{20}=89$ ,  $p<0.001$ ), and a likelihood ratio test supported  
151 its inclusion over the intercept-only model ( $\chi^2=57.9$ ,  $p<0.001$ ). This verifies high spatiotemporal  
152 variation in viral detection estimates, highlighting the need for spatiotemporal sampling designs.

153

## 154 **Discussion**

155 Our study provides a systematic synthesis of prevalence and seroprevalence for bat filoviruses  
156 and henipaviruses. Viral detection estimates varied significantly within and between longitudinal  
157 studies, indicating that spatiotemporal sampling is essential to make inferences about bat virus  
158 spillover, especially if a natural reservoir host species has already been identified. Yet few  
159 studies used spatiotemporal designs; only one in every five studies reported longitudinal data.  
160 Sampling design and reporting were also associated with some viral detection estimates. We  
161 therefore implore researchers to publish bat viral data at the lowest spatial and temporal  
162 resolution associated with sampling and to provide raw data at such resolutions when possible.

163 Geographic limitations were also evident for overall sampling effort and where  
164 longitudinal studies have been performed. This was especially evident for filoviruses; although  
165 the lack of studies in Latin America and Oceania likely reflect the absence of reported human

166 cases, bat reservoir hosts are predicted to occur in both regions [42]. Most studies also used  
167 either PCR or serology, although using both data streams may improve statistical inference about  
168 how zoonotic pathogens persist in reservoir host populations [19]. Rigorous case studies using  
169 explicitly spatiotemporal sampling in such understudied regions will be critical to improve  
170 understanding viral shedding dynamics in bats and how spillover risk varies over time and space.

171

#### 172 **Data availability**

173 Data will be deposited in Dryad upon acceptance.

174

#### 175 **Author contributions**

176 DJB and DEC designed the study, DEC collected data, DJB analyzed data, and all authors  
177 contributed to writing the manuscript.

178

#### 179 **Funding**

180 The authors were supported by the National Science Foundation (DEB-1716698) and the  
181 Defense Advanced Research Projects Agency (Young Faculty Award D16AP00113 and  
182 PREEMPT award D18AC0003). The content of the information does not necessarily reflect the  
183 position or the policy of the U.S. government, and no official endorsement should be inferred.

184

#### 185 **Acknowledgements**

186 We thank Megan Higgs and two anonymous reviewers for helpful comments on this manuscript.

187 **References**

- 188 1. Plowright RK, Parrish CR, McCallum H, Hudson PJ, Ko AI, Graham AL, Lloyd-Smith JO.  
189 2017 Pathways to zoonotic spillover. *Nat. Rev. Microbiol.* **15**, 502–510.
- 190 2. Schmidt JP, Park AW, Kramer AM, Han BA, Alexander LW, Drake JM. 2017  
191 Spatiotemporal Fluctuations and Triggers of Ebola Virus Spillover. *Emerg. Infect. Dis.* **23**,  
192 415–422. (doi:10.3201/eid2303.160101)
- 193 3. Hoyer BJ, Munster VJ, Nishiura H, Klaassen M, Fouchier RAM. 2010 Surveillance of Wild  
194 Birds for Avian Influenza Virus. *Emerg. Infect. Dis.* **16**, 1827–1834.  
195 (doi:10.3201/eid1612.100589)
- 196 4. Plowright RK *et al.* 2015 Ecological dynamics of emerging bat virus spillover. *Proc R Soc B*  
197 **282**, 20142124. (doi:10.1098/rspb.2014.2124)
- 198 5. Vergara PM, Saravia-Zepeda A, Castro-Reyes N, Simonetti JA. 2016 Is metapopulation  
199 patch occupancy in nature well predicted by the Levins model? *Popul. Ecol.* , 1–9.  
200 (doi:10.1007/s10144-016-0550-5)
- 201 6. Plowright RK, Foley P, Field HE, Dobson AP, Foley JE, Eby P, Daszak P. 2011 Urban  
202 habituation, ecological connectivity and epidemic dampening: the emergence of Hendra  
203 virus from flying foxes (*Pteropus* spp.). *Proc. R. Soc. B Biol. Sci.* **278**, 3703–3712.  
204 (doi:10.1098/rspb.2011.0522)
- 205 7. Hess G. 1996 Disease in Metapopulation Models: Implications for Conservation. *Ecology*  
206 **77**, 1617–1632. (doi:10.2307/2265556)
- 207 8. Bjørnstad ON, Ims RA, Lambin X. 1999 Spatial population dynamics: analyzing patterns  
208 and processes of population synchrony. *Trends Ecol. Evol.* **14**, 427–432.
- 209 9. Peel AJ *et al.* 2013 Continent-wide panmixia of an African fruit bat facilitates transmission  
210 of potentially zoonotic viruses. *Nat. Commun.* **4**, 2770. (doi:10.1038/ncomms3770)
- 211 10. Altizer S, Dobson A, Hosseini P, Hudson P, Pascual M, Rohani P. 2006 Seasonality and the  
212 dynamics of infectious diseases. *Ecol. Lett.* **9**, 467–484.
- 213 11. Peel AJ, Pulliam JRC, Luis AD, Plowright RK, O’Shea TJ, Hayman DTS, Wood JLN, Webb  
214 CT, Restif O. 2014 The effect of seasonal birth pulses on pathogen persistence in wild  
215 mammal populations. *Proc. R. Soc. Lond. B Biol. Sci.* **281**, 20132962.  
216 (doi:10.1098/rspb.2013.2962)
- 217 12. Kuiken T, Leighton FA, Fouchier R a. M, LeDuc JW, Peiris JSM, Schudel A, Stöhr K,  
218 Osterhaus ADME. 2005 Pathogen Surveillance in Animals. *Science* **309**, 1680–1681.  
219 (doi:10.1126/science.1113310)
- 220 13. Stallknecht DE. 2007 Impediments to Wildlife Disease Surveillance, Research, and  
221 Diagnostics. In *Wildlife and Emerging Zoonotic Diseases: The Biology, Circumstances and*

- 222        *Consequences of Cross-Species Transmission*, pp. 445–461. Springer, Berlin, Heidelberg.  
223        (doi:10.1007/978-3-540-70962-6\_17)
- 224    14. Nusser SM, Clark WR, Otis DL, Huang L. 2008 Sampling Considerations for Disease  
225        Surveillance in Wildlife Populations. *J. Wildl. Manag.* **72**, 52–60.
- 226    15. Venette RC, Moon RD, Hutchison WD. 2002 Strategies and statistics of sampling for rare  
227        individuals. *Annu. Rev. Entomol.* **47**, 143–174.  
228        (doi:10.1146/annurev.ento.47.091201.145147)
- 229    16. Hayman DTS, Suu-Ire R, Breed AC, McEachern JA, Wang L, Wood JLN, Cunningham AA.  
230        2008 Evidence of Henipavirus Infection in West African Fruit Bats. *PLOS ONE* **3**, e2739.  
231        (doi:10.1371/journal.pone.0002739)
- 232    17. Peterson AT. 2006 Ecologic Niche Modeling and Spatial Patterns of Disease Transmission.  
233        *Emerg. Infect. Dis.* **12**, 1822–1826. (doi:10.3201/eid1212.060373)
- 234    18. Wang J-F, Stein A, Gao B-B, Ge Y. 2012 A review of spatial sampling. *Spat. Stat.* **2**, 1–14.  
235        (doi:10.1016/j.spasta.2012.08.001)
- 236    19. Plowright RK, Peel AJ, Streicker DG, Gilbert AT, McCallum H, Wood J, Baker ML, Restif  
237        O. 2016 Transmission or Within-Host Dynamics Driving Pulses of Zoonotic Viruses in  
238        Reservoir–Host Populations. *PLoS Negl. Trop. Dis.* **10**, e0004796.  
239        (doi:10.1371/journal.pntd.0004796)
- 240    20. Restif O *et al.* 2012 Model-guided fieldwork: practical guidelines for multidisciplinary  
241        research on wildlife ecological and epidemiological dynamics. *Ecol. Lett.* **15**, 1083–1094.
- 242    21. Bailey LL, Hines JE, Nichols JD, MacKenzie DI. 2007 Sampling design trade-offs in  
243        occupancy studies with imperfect detection: examples and software. *Ecol. Appl.* **17**, 281–  
244        290.
- 245    22. Estes L, Elsen PR, Treuer T, Ahmed L, Caylor K, Chang J, Choi JJ, Ellis EC. 2018 The  
246        spatial and temporal domains of modern ecology. *Nat. Ecol. Evol.* , 1. (doi:10.1038/s41559-  
247        018-0524-4)
- 248    23. Marsh DM, Trenham PC. 2008 Current trends in plant and animal population monitoring.  
249        *Conserv. Biol.* **22**, 647–655.
- 250    24. Luis AD *et al.* 2013 A comparison of bats and rodents as reservoirs of zoonotic viruses: are  
251        bats special? *Proc R Soc B* **280**, 20122753. (doi:10.1098/rspb.2012.2753)
- 252    25. Olival KJ, Hosseini PR, Zambrana-Torrel C, Ross N, Bogich TL, Daszak P. 2017 Host and  
253        viral traits predict zoonotic spillover from mammals. *Nature* **546**, 646–650.  
254        (doi:10.1038/nature22975)
- 255    26. Amman BR *et al.* 2015 Oral shedding of marburg virus in experimentally infected egyptian  
256        fruit bats (*rousettus aegyptiacus*). *J. Wildl. Dis.* **51**, 113–124. (doi:10.7589/2014-08-198)

- 257 27. Halpin K *et al.* 2011 Pteropid bats are confirmed as the reservoir hosts of henipaviruses: a  
258 comprehensive experimental study of virus transmission. *Am. J. Trop. Med. Hyg.* **85**, 946–  
259 951. (doi:10.4269/ajtmh.2011.10-0567)
- 260 28. Drexler JF *et al.* 2009 Henipavirus RNA in African Bats. *PLOS ONE* **4**, e6367.  
261 (doi:10.1371/journal.pone.0006367)
- 262 29. Leroy EM, Epelboin A, Mondonge V, Pourrut X, Gonzalez J-P, Muyembe-Tamfum J-J,  
263 Formenty P. 2009 Human Ebola Outbreak Resulting from Direct Exposure to Fruit Bats in  
264 Luebo, Democratic Republic of Congo, 2007. *Vector-Borne Zoonotic Dis.* **9**, 723–728.  
265 (doi:10.1089/vbz.2008.0167)
- 266 30. Brook CE *et al.* 2019 Disentangling serology to elucidate henipa- and filovirus transmission  
267 in Madagascar fruit bats. *J. Anim. Ecol.* **0**. (doi:10.1111/1365-2656.12985)
- 268 31. Leroy EM *et al.* 2005 Fruit bats as reservoirs of Ebola virus. *Nature* **438**, 575–576.
- 269 32. Pernet O *et al.* 2014 Evidence for henipavirus spillover into human populations in Africa.  
270 *Nat. Commun.* **5**, 5342.
- 271 33. Schuh AJ *et al.* 2017 Modelling filovirus maintenance in nature by experimental  
272 transmission of Marburg virus between Egyptian rousette bats. *Nat. Commun.* **8**, 14446.
- 273 34. Middleton DJ, Morrissy CJ, van der Heide BM, Russell GM, Braun MA, Westbury HA,  
274 Halpin K, Daniels PW. 2007 Experimental Nipah Virus Infection in Pteropid Bats (*Pteropus*  
275 *poliocephalus*). *J. Comp. Pathol.* **136**, 266–272. (doi:10.1016/j.jcpa.2007.03.002)
- 276 35. Amman BR *et al.* 2012 Seasonal Pulses of Marburg Virus Circulation in Juvenile *Rousettus*  
277 *aegyptiacus* Bats Coincide with Periods of Increased Risk of Human Infection. *PLOS*  
278 *Pathog.* **8**, e1002877. (doi:10.1371/journal.ppat.1002877)
- 279 36. McFarlane R, Becker N, Field H. 2011 Investigation of the Climatic and Environmental  
280 Context of Hendra Virus Spillover Events 1994–2010. *PLOS ONE* **6**, e28374.  
281 (doi:10.1371/journal.pone.0028374)
- 282 37. Luby SP *et al.* 2006 Foodborne Transmission of Nipah Virus, Bangladesh. *Emerg. Infect.*  
283 *Dis.* **12**, 1888–1894. (doi:10.3201/eid1212.060732)
- 284 38. Pulliam JRC *et al.* 2012 Agricultural intensification, priming for persistence and the  
285 emergence of Nipah virus: a lethal bat-borne zoonosis. *J. R. Soc. Interface* **9**, 89–101.  
286 (doi:10.1098/rsif.2011.0223)
- 287 39. Pourrut X, Délicat A, Rollin PE, Ksiazek TG, Gonzalez J-P, Leroy EM. 2007 Spatial and  
288 Temporal Patterns of Zaire ebolavirus Antibody Prevalence in the Possible Reservoir Bat  
289 Species. *J. Infect. Dis.* **196**, S176–S183. (doi:10.1086/520541)



- 290 40. Páez DJ, Giles J, McCallum H, Field H, Jordan D, Peel AJ, Plowright RK. 2017 Conditions  
291 affecting the timing and magnitude of Hendra virus shedding across pteropodid bat  
292 populations in Australia. *Epidemiol. Infect.* , 1–11. (doi:10.1017/S0950268817002138)
- 293 41. Drexler JF *et al.* 2012 Bats host major mammalian paramyxoviruses. *Nat. Commun.* **3**, 796.  
294 (doi:10.1038/ncomms1796)
- 295 42. Han BA, Schmidt JP, Alexander LW, Bowden SE, Hayman DT, Drake JM. 2016  
296 Undiscovered bat hosts of filoviruses. *PLOS Negl Trop Dis* **10**, e0004815.
- 297 43. Hayman DTS, Bowen RA, Cryan PM, McCracken GF, O’Shea TJ, Peel AJ, Gilbert A, Webb  
298 CT, Wood JLN. 2013 Ecology of Zoonotic Infectious Diseases in Bats: Current Knowledge  
299 and Future Directions. *Zoonoses Public Health* **60**, 2–21. (doi:10.1111/zph.12000)
- 300 44. Peel AJ *et al.* 2013 Use of cross-reactive serological assays for detecting novel pathogens in  
301 wildlife: Assessing an appropriate cutoff for henipavirus assays in African bats. *J. Virol.*  
302 *Methods* **193**, 295–303. (doi:10.1016/j.jviromet.2013.06.030)
- 303 45. Gilbert AT *et al.* 2013 Deciphering serology to understand the ecology of infectious diseases  
304 in wildlife. *Ecohealth* **10**, 298–313.
- 305 46. Wacharapluesadee S, Boongird K, Wanghongsa S, Ratanasetyuth N, Supavonwong P,  
306 Saengsen D, Gongal G n., Hemachudha T. 2009 A Longitudinal Study of the Prevalence of  
307 Nipah Virus in Pteropus lylei Bats in Thailand: Evidence for Seasonal Preference in Disease  
308 Transmission. *Vector-Borne Zoonotic Dis.* **10**, 183–190. (doi:10.1089/vbz.2008.0105)
- 309 47. Viechtbauer W. 2010 Conducting meta-analyses in R with the metafor package. *J. Stat.*  
310 *Softw.* **36**, 1–48.
- 311 48. Konstantopoulos S. 2011 Fixed effects and variance components estimation in three-level  
312 meta-analysis. *Res. Synth. Methods* **2**, 61–76.
- 313 49. Michonneau F, Brown JW, Winter DJ. 2016 rotl : an R package to interact with the Open  
314 Tree of Life data. *Methods Ecol. Evol.* (doi:10.1111/2041-210X.12593)
- 315 50. Hinchliff CE *et al.* 2015 Synthesis of phylogeny and taxonomy into a comprehensive tree of  
316 life. *Proc. Natl. Acad. Sci.* , 201423041. (doi:10.1073/pnas.1423041112)
- 317 51. Paradis E, Claude J, Strimmer K. 2004 APE: analyses of phylogenetics and evolution in R  
318 language. *Bioinformatics* **20**, 289–290.
- 319 52. Becker DJ, Streicker DG, Altizer S. 2018 Using host species traits to understand the  
320 consequences of resource provisioning for host–parasite interactions. *J. Anim. Ecol.* **87**, 511–  
321 525. (doi:10.1111/1365-2656.12765)
- 322 53. Nakagawa S, Santos ES. 2012 Methodological issues and advances in biological meta-  
323 analysis. *Evol. Ecol.* **26**, 1253–1274.

324 54. Senior AM, Grueber CE, Kamiya T, Lagisz M, O'Dwyer K, Santos ESA, Nakagawa S. 2016  
325 Heterogeneity in ecological and evolutionary meta-analyses: its magnitude and implications.  
326 *Ecology* **97**, 3293–3299. (doi:10.1002/ecy.1591)

327

328 **Tables**

329

330 Table 1. Summary of the temporal and spatial limitations for bat filovirus and henipavirus  
 331 prevalence and seroprevalence data. Some studies had multiple diagnostic methods and reporting  
 332 methods. Diagnostic mismatch refers to regions where either PCR or serology have been used.

|               |          | Longitudinal virus studies | Geographic sampling gaps               | Diagnostic mismatch                                 | Regions with longitudinal data                |
|---------------|----------|----------------------------|----------------------------------------|-----------------------------------------------------|-----------------------------------------------|
| Filoviruses   | PCR      | 2/15                       | Latin America, Oceania, Western Africa | Europe, Western Africa                              | Central Africa, Eastern Africa                |
|               | Serology | 4/18                       | Latin America, Oceania, Europe         |                                                     | Central Africa, Eastern Africa, Middle Africa |
| Henipaviruses | PCR      | 3/10                       | Eastern Africa, Eastern Asia           | Europe, Eastern Africa, Middle Africa, Eastern Asia | Southeastern Asia, Oceania                    |
|               | Serology | 4/27                       | Middle Africa, Europe                  |                                                     |                                               |

333

334

335 **Figures and legends**

336

337 Figure 1. Characterizing studies of prevalence and seroprevalence for filoviruses and  
338 henipaviruses in wild bats. Top: Conceptual schematic of how different sampling designs and  
339 data reporting (colored points and lines) capture the underlying temporal patterns in viral  
340 infection (black line), followed by observed proportions for field studies of bat filoviruses and  
341 henipaviruses (grey shows the proportion of studies not reporting sampling designs). Bottom:  
342 Countries sampled for filoviruses and henipaviruses and where wild bats have been found  
343 positive (prevalence or seroprevalence greater than zero) by PCR or serology.

344

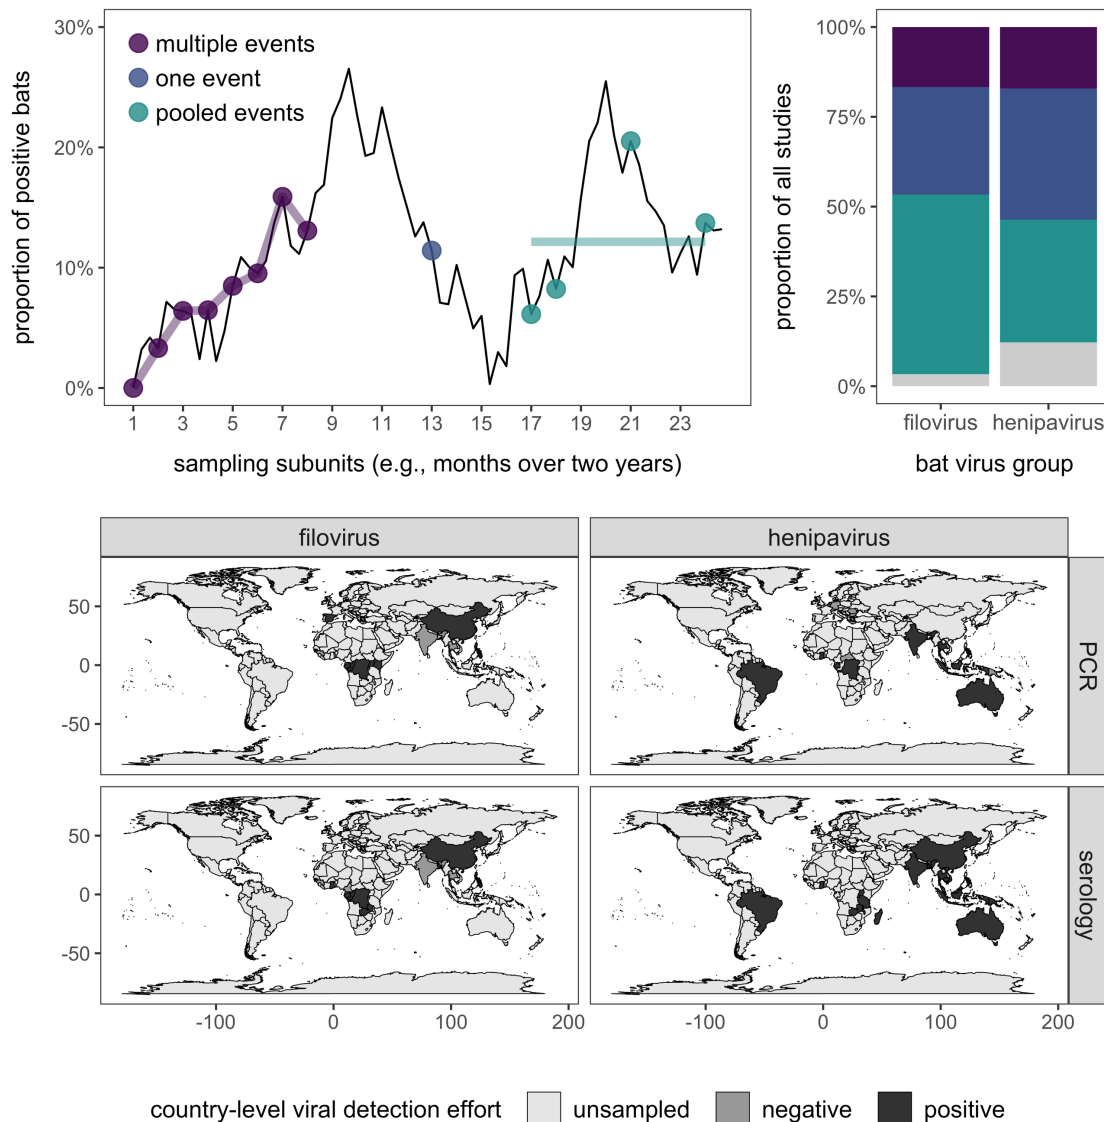

345

346

347 Figure 2. Top: Influence of sampling design and reporting on virus detection estimates. Circles  
 348 show proportions of positive bats per subunit and are colored by sampling design; lines and  
 349 diamonds display back-transformed predicted means and 95% confidence intervals from the  
 350 phylogenetic meta-analysis (limited to data reported per bat species or genus). Bottom:  
 351 Spatiotemporal variation in viral detection estimates for studies that reported sampling across  
 352 multiple months. Points represent each detection estimate per subunit and are shaped by  
 353 sampling locations per subunit.  
 354

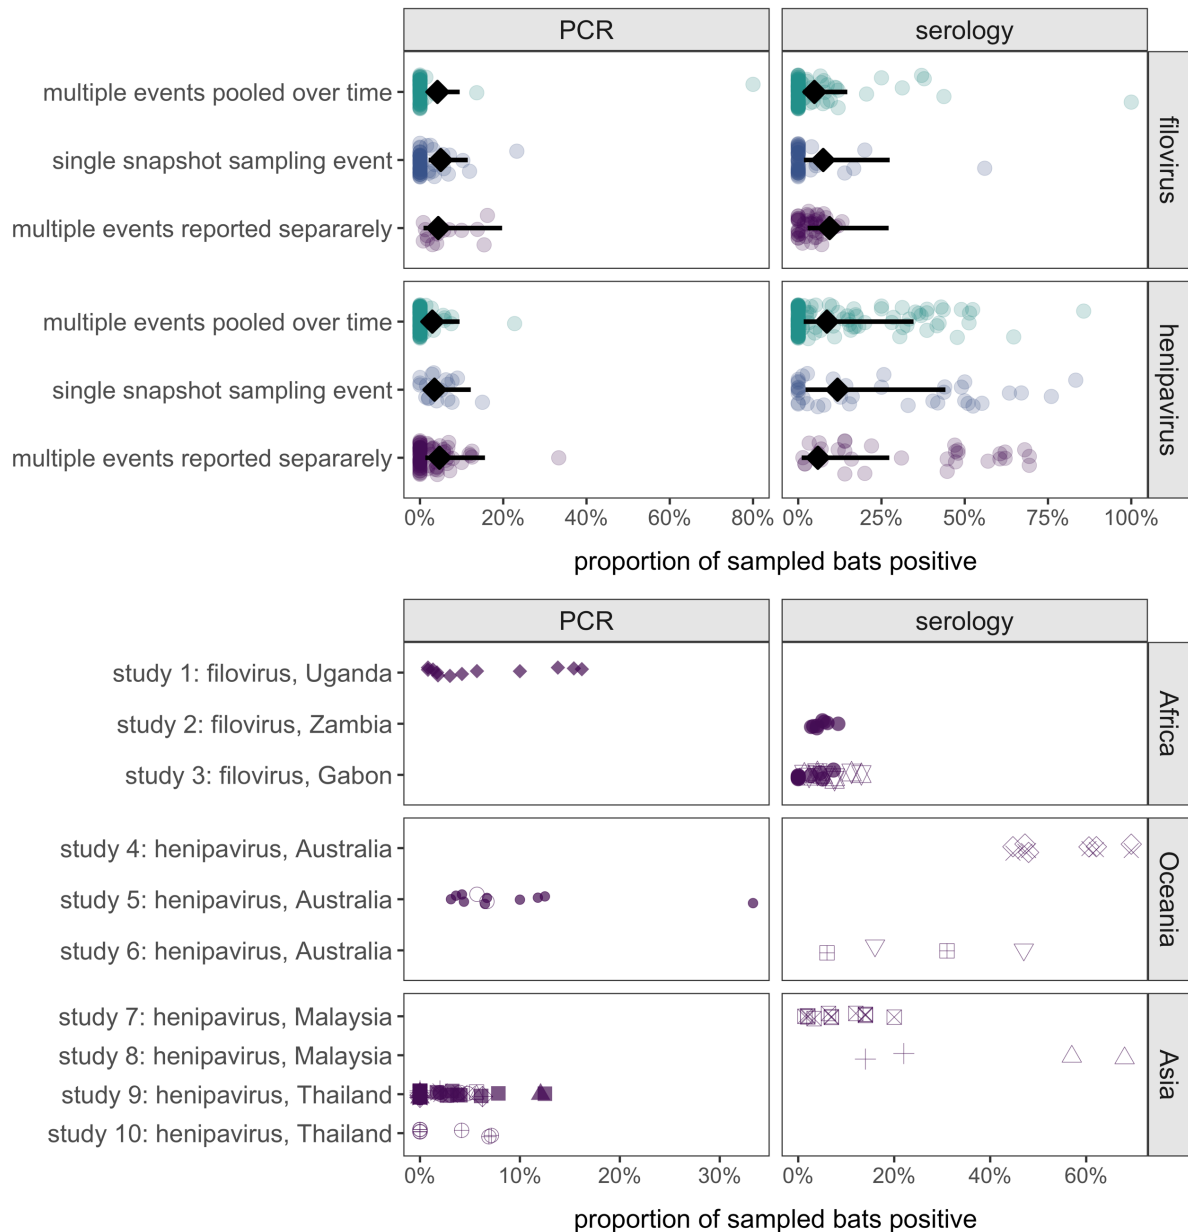

355
