# 1 **Temporal and spatial limitations in global surveillance for bat filoviruses and** 2 **henipaviruses**

3

4 Daniel J. Becker<sup>1-3\*</sup>, Daniel E. Crowley<sup>1</sup>, Alex D. Washburne<sup>1</sup>, Raina K. Plowright<sup>1</sup>

5

6 <sup>1</sup>Department of Microbiology and Immunology, Montana State University, Bozeman, Montana

7 <sup>2</sup>Department of Biology, Indiana University, Bloomington, Indiana

8 <sup>3</sup>Center for the Ecology of Infectious Diseases, University of Georgia, Athens, Georgia

9 \*[danbeck@iu.edu](mailto:danbeck@iu.edu)

10

11 **Running head:** Spatiotemporal bat virus dynamics

12 **Keywords:** Chiroptera; spillover; sampling design; zoonotic virus; phylogenetic meta-analysis;  
13 spatiotemporal

14

## 15 **Abstract**

16 Sampling reservoir hosts over time and space is critical to detect epizootics, predict spillover,  
17 and design interventions. However, because sampling is logistically difficult and expensive,  
18 researchers rarely perform spatiotemporal sampling of many reservoir hosts. Bats are reservoirs  
19 of many virulent zoonotic pathogens such as filoviruses and henipaviruses, yet the highly mobile  
20 nature of these animals has limited optimal sampling of bat populations. To quantify the  
21 frequency of temporal sampling and to characterize the geographic scope of bat virus research,  
22 we here collated data on filovirus and henipavirus prevalence and seroprevalence in wild bats.  
23 We used a phylogenetically controlled meta-analysis to next assess temporal and spatial variation  
24 in bat virus detection estimates. Our analysis shows that only one in four bat virus studies report  
25 data longitudinally, that sampling efforts cluster geographically (e.g., filovirus data are available  
26 across much of Africa and Asia but are absent from Latin America and Oceania), and that  
27 sampling designs and reporting practices may affect some viral detection estimates (e.g.,  
28 filovirus seroprevalence). Within the limited number of longitudinal bat virus studies, we  
29 observed high heterogeneity in viral detection estimates that in turn reflected both spatial and  
30 temporal variation. This suggests that spatiotemporal sampling designs are essential to  
31 understand how zoonotic viruses are maintained and spread within and across wild bat  
32 populations, which in turn could help predict and preempt risks of zoonotic viral spillover.

## 33 Introduction

34 Risks of pathogen spillover vary across time and space [1,2], in part because pathogen shedding  
35 from reservoir hosts is a dynamic spatiotemporal processes [3,4]. Metapopulation dynamics and  
36 other spatial processes characterize many reservoir hosts [5], where populations connectivity can  
37 determine the spatiotemporal distribution of a pathogen [6,7] and degree of spatial synchrony  
38 structuring infection dynamics [8]. Temporal pulses of shedding driven by seasonality in birth  
39 and climate are also common [9,10]. Understanding how infection in reservoir hosts varies over  
40 space and time is thus a critical need for predicting and managing zoonotic disease risks.

41 However, surveillance strategies often do not sample this underlying spatiotemporal  
42 process, as spatially and temporally explicit designs present logistical challenges when studying  
43 mobile and gregarious species [3,11,12]. For hosts such as birds and bats, surveillance is often  
44 opportunistic or relies on convenience sampling [13]. These non-probabilistic and often single  
45 sampling events cannot characterize spatial and temporal fluctuations in infection, can over- or  
46 under-represent times or locations of high prevalence, and can result in non-randomly missing  
47 data [3,14]. These challenges cannot be fixed with statistical modeling and can bias estimates of  
48 prevalence and epidemiological parameters such as the basic reproductive number [13,15].

49 Given a fixed cost, difficult decisions must be made about how to allocate sampling  
50 efforts. Sampling over space facilitates detecting geographic clusters of disease and predictive  
51 mapping [16,17], while sampling over time can identify periods of intensive pathogen shedding  
52 and enable inference about dominant transmission routes [18,19]. Researchers often treat this as  
53 a tradeoff between sampling over either time or space, rather than allocating effort to both [20].  
54 Implicit here is that the temporal component is constant over space or that the spatial component  
55 is constant over time, and such sampling designs result in no data to assess this assumption.

56 We here quantify the temporal and spatial data limitations for two taxa of high-profile  
57 zoonotic viruses of bats: the family *Filoviridae* and genus *Henipavirus*. Bats have been widely  
58 studied as reservoirs for zoonotic pathogens and host more viruses with zoonotic potential than  
59 other mammals [21,22]. Henipaviruses and some filoviruses (e.g., Marburg virus) can be shed  
60 from bats into the environment [23,24] and can cause fatal disease in humans by environmental  
61 exposure or from contact with intermediate hosts such as horses, wild primates, or pigs [25–30].  
62 Current evidence suggests many filo- and henipaviruses show variable dynamics in space and  
63 time, including shedding pulses from bats [6,25,31–33], which implies that spatiotemporal  
64 sampling is critical to capture viral dynamics in bat reservoirs. Yet while past efforts have  
65 focused on bat virus discovery [34], the determinants of reservoir status [35], and experimental  
66 mechanisms of viral transmission [36], spatiotemporal studies of bat–virus dynamics are rare  
67 [37]. This limits understanding how zoonotic viruses are maintained and spread within and  
68 across bat populations and impairs improving future sampling designs and ecological  
69 interventions [20,38]. We here systematically collated data on the prevalence and seroprevalence  
70 of filo- and henipaviruses in wild bats to (i) quantify the frequency of temporal studies and (ii)  
71 assess the geographic scope of current research. We used phylogenetic meta-analysis to (iii)  
72 quantify how sampling designs and reporting practices may influence viral detection estimates.  
73 Single snapshots could miss pulses of viral shedding from bats, whereas pooling data over time  
74 could under- or overestimate viral presence [18,20]. Lastly, we (iv) characterized the degree of  
75 temporal and spatial variation in bat virus detection estimates.

76

## 77 Methods

78 To systematically identify studies quantifying the proportion of wild bats positive for filoviruses  
79 and henipaviruses using PCR or serology, we searched Web of Science, CAB Abstracts, and  
80 PubMed (see Fig. S1). Our dataset included 1176 records from 68 studies. Viruses included not  
81 only Hendra, Nipah, Ebola, and Marburg virus but also Lloviu and Reston virus. We grouped  
82 viruses by taxa given our sample sizes and known issues of serological cross-reactivity [39,40].

83 From each study, we defined sampling subunits: a temporally defined sampling event of  
84 one bat species in one location per viral detection estimate. Each subunit is the lowest spatial,  
85 temporal, and phylogenetic scale (of bats and their viruses) reported. We classified subunits into  
86 three sampling designs and reporting practices: one sampling event, multiple events, or pooled  
87 events over time. Records of a single prevalence or seroprevalence estimate from a population  
88 sampled from a period less than or equal to one month were classified as single sampling events,  
89 whereas records of a population over multiple monthly timepoints were classified as spanning  
90 multiple events (i.e., a longitudinal study). For example, every monthly prevalence estimate per  
91 population of *Pteropus lylei* in Thailand would represent a unique subunit and be classified as  
92 longitudinal [41]. Records of a period longer than one month were classified as pooled events,  
93 where researchers may have sampled a population across more than one timepoint but reported  
94 data as a single viral detection estimate. A schematic of these categorizations is provided in  
95 Figure 1A. One month was selected because this timeframe was the lowest common temporal  
96 unit and because bat shedding of these viruses can occur within a month [36,42]. These data  
97 were reported for most records (1121/1176 subunits; three publications did not report these data  
98 and three additional publications did not always report such data for all records). For each  
99 subunit, we also recorded the bat species, virus taxon, coarse detection method (i.e., PCR or  
100 serology), number of bats sampled, proportion of bats positive, sampling timepoints, sampling  
101 location, and country (recoded to the United Nations geoscheme for our descriptive analyses).

102 We quantified the proportion of studies using each sampling and reporting design, both  
103 across all data and stratified by virus taxon. To assess how the frequency of longitudinal studies  
104 (i.e., those with repeated sampling) has changed over time, we fit a generalized additive model  
105 with the *mgcv* package in R and a smooth term for publication year [43]. We also calculated the  
106 duration of repeat sampling for these longitudinal studies. For studies that pooled data over time,  
107 we quantified days represented per subunit. To describe geographic biases in bat virus studies,  
108 we assessed sampling gaps according to region (United Nations geoscheme). We used a  $\chi^2$  test to  
109 assess if sampling designs and reporting practices were differently distributed across regions.

110 To assess the contribution of sampling designs and reporting practices to viral detection  
111 estimates and to quantify the degree of spatial and temporal variation in bat–virus interactions,  
112 we used the *metafor* package to calculate logit-transformed proportions and sampling variances  
113 and to fit hierarchical meta-analysis models [44,45]. To account for phylogenetic dependence,  
114 we included bat species as a random effect [46], for which the covariance structure used the  
115 phylogenetic correlation matrix; we obtained our phylogeny from the Open Tree of Life with the  
116 *rotl* and *ape* packages [47,48]. We excluded subunits that pooled data across or within bat genera  
117 ( $n=102$ ). As few subunits ( $n=14$ ) pooled data across specified species in a genus, we randomly  
118 selected one species to retain these records. Our final dataset included 1019 subunits from 60  
119 studies and 215 bat species (Fig. S2). Our models also included subunit nested within study as a  
120 random effect and weighting by sampling variances. To first assess heterogeneity among viral  
121 detection estimates, we fit a random-effects model (REM; intercept only) and stratified this  
122 analysis per viral taxon and detection method. We used restricted maximum likelihood to obtain  
123 unbiased estimates of the variance components, from which we derived  $I^2$  to quantify the

124 contribution of true heterogeneity to total variance in viral detection estimates [49]. We used  
125 these estimates to partition variance attributed to each random effect; in the case of bat species,  
126 we derived phylogenetic heritability ( $H^2$ ) as a measure of phylogenetic signal [46]. We used  
127 Cochran's  $Q$  to test if such heterogeneity was greater than expected by sampling error alone [50].

128 To next test how sampling designs and reporting practices may influence viral detection  
129 estimates, we fit a mixed-effects model (MEM) with the same random effects and an interaction  
130 between sampling design and reporting practices, detection method, and virus taxon. We tested  
131 significance of moderators and interactions using the  $Q$  test [44] and derived a pseudo- $R^2$  as the  
132 proportional reduction in the summed variance components compared with those of a REM [51].

133 To test if viral detection estimates showed spatiotemporal variation, we fit models with  
134 the same random effects to our data subset reporting multiple events ( $n=273$ ). We fit a REM to  
135 quantify  $I^2$  for longitudinal studies. We then fit MEMs with location and month as univariate  
136 moderators to test if viral detection estimates varied across space and time. Because this subset  
137 of the data included many unique locations ( $n=28$ ) and months ( $n=12$ ), we did not use interaction  
138 terms and instead fit an additional set of MEMs to each viral taxon–detection method strata.

139

## 140 Results

141 Only 26% of bat virus studies reported data longitudinally (10 filo- and 9 henipavirus studies;  
142 Fig. 1). However, the frequency of such studies has weakly increased over time (Fig. S3,  
143  $\chi^2_1=2.75$ ,  $p=0.1$ ). Eleven studies reported sampling populations 2–3 times while 12 reported  
144 sampling populations over four times. The duration of longitudinal studies ranged from 150 days  
145 to over 10 years, on average spanning 2.5 years of repeat sampling (Fig. S4). In contrast, half of  
146 our studies ( $n=34$ ) instead reported estimates across multiple timepoints as pooled proportions,  
147 which on average represented 644 days of temporally aggregated data (SD=492; Fig. S5).

148 Bat sampling also showed geographic biases (Fig. 1, Table 1). Filovirus studies were  
149 conducted across much of Africa and Asia but not in Latin America and Oceania. PCR and  
150 serology have been used in the same region in most areas, but only one or the other have been  
151 used in Southern Africa for filoviruses and in Europe, Eastern and Middle Africa, and Eastern  
152 Asia for henipaviruses (Table 1). Geography was also associated with sampling design and  
153 reporting practices ( $\chi^2=369.3$ ,  $p=0.001$ ). Longitudinal data were only reported from Central,  
154 Eastern, Middle, and Southern Africa for filoviruses and only reported from Southeastern Asia,  
155 Eastern Africa, and Oceania for henipaviruses (Table 1).

156 We observed significant heterogeneity across viral detection estimates ( $I^2=0.91$ ,  
157  $Q_{1017}=6929$ ,  $p<0.001$ ). Bat species and study accounted for most variation ( $I^2_{species}=0.41$ ,  
158  $I^2_{study}=0.34$ ,  $H^2=0.45$ ; Table S2). We also found significant heterogeneity within each viral  
159 taxon–detection strata, although  $I^2$  and  $H^2$  values varied across these subsets (Table S1). Viral  
160 detection estimates for henipaviruses had much stronger phylogenetic signal than filoviruses.

161 Our MEM showed that viral detection estimates broadly varied with detection method  
162 ( $Q_1=5.41$ ,  $p=0.02$ ; seroprevalence was generally higher than prevalence) and were associated  
163 with sampling design and reporting; however, the effect tended to depend on virus taxa and  
164 detection method (three-way interaction:  $Q_2=5.36$ ,  $p=0.07$ ,  $R^2=0.06$ ; Table S2). A post-hoc  
165 analysis with MEMs fit to each strata showed sampling design and reporting were associated  
166 with filovirus seroprevalence ( $Q_2=10.30$ ,  $p=0.006$ ; Fig. 2), with longitudinal studies generally

167 showing higher proportions of positive bats. Sampling design and reporting had no effects on  
168 henipavirus seroprevalence nor prevalence estimates for either virus taxon (Table S3).

169 We also detected high variation in viral detection estimates across longitudinal studies  
170 ( $Q_{271}=2866, p<0.0001, I^2=0.94$ ; Fig. 2). Study contributed more to residual variance than  
171 phylogeny ( $I^2_{species}=0.28, I^2_{study}=0.52, I^2_{subunit}=0.13$ ). Across these data, location did not predict  
172 viral detection estimates ( $Q_{28}=17.67, p=0.91$ ); however, MEMs fit to each strata showed high  
173 spatial variation for all subsets except filovirus prevalence (Table S4). Month also had little  
174 predictive power across all longitudinal data ( $Q_{11}=6.93, p=0.80$ ), but separate MEMs revealed  
175 high temporal variation for filovirus seroprevalence and henipavirus prevalence (Table S5).

176

## 177 Discussion

178 Our study provides a systematic synthesis of prevalence and seroprevalence for bat filoviruses  
179 and henipaviruses that can guide future sampling. Only one in four studies reported longitudinal  
180 data, although use of such approaches is increasing. Half of studies instead pooled data over time  
181 (and space). Geographic limitations were also evident, especially for where longitudinal studies  
182 have been conducted. This was especially evident for filoviruses; although the absence of studies  
183 in Latin America and Oceania may reflect the lack of reported human cases, bat reservoirs are  
184 predicted to occur in both regions [35]. Many studies also used either PCR or serology, although  
185 using both may improve statistical inference about how zoonotic pathogens persist in hosts [18].

186 We found generally weak evidence that such variation in sampling design and reporting  
187 affected viral detection estimates, although filovirus seroprevalence tended to be greatest from  
188 longitudinal studies. Serological surveys of Marburg and Ebola virus have found strong temporal  
189 dynamics that may reflect seasonality in bat reproduction or resource availability [31,52,53].  
190 Detection estimates could be higher with repeated sampling, given that such studies are more  
191 likely to detect shedding pulses and pooling of data could increase zeros in the numerator  
192 (underestimating seroprevalence). The lack of a similar pattern for filovirus PCR data could  
193 result from low prevalence and be biased by zero inflation. We also qualify that our low  $R^2$ ,  
194 alongside high contributions of bat phylogeny and study random effects, suggests other aspects  
195 of bat ecology (e.g., seasonal birth [31,54]) or study idiosyncrasies (e.g., serological cutoffs  
196 [39,40]) may play more critical roles in shaping viral detection estimates. High  $H^2$  for  
197 henipaviruses suggests cladistic or trait-based analyses of shedding could be insightful [35,55].  
198 Yet given the potential for sampling design and reporting to affect viral detection estimates, we  
199 encourage researchers to publish data at the lowest spatial, temporal, and phylogenetic scale  
200 associated with sampling and to provide data at such scales to facilitate these future analyses.

201 Our analysis of longitudinal studies found significant spatial and temporal variation in  
202 some bat virus data. This implies spatiotemporal sampling is critical to make inferences about  
203 bat virus spillover. Although sampling over space and time is challenging, especially for highly  
204 mobile animals like bats, sampling can be informed by spatiotemporal variation in prevalence  
205 and seroprevalence and analyses of spatiotemporal autocorrelation [20,56]. Greater variation  
206 over space can require more fine-scale spatial sampling, and greater variation over time can  
207 require more fine-scale temporal sampling. Spatiotemporal designs, such as stratified random  
208 sampling or rotating panels, can help capture spatial and temporal variation in virus shedding  
209 while also addressing some logistical challenges [13,57,58]. The increased adoption of such  
210 approaches, especially in the understudied regions identified in our analysis, will be key to  
211 improve understanding bat virus dynamics and how spillover risk varies over time and space.



212

213 **Data availability**

214 Data are available in the Dryad Digital Repository [59].

215

216 **Author contributions**

217 DJB and DEC designed the study, DEC collected data, DJB analyzed data, and all authors  
218 contributed to writing the manuscript.

219

220 **Funding**

221 The authors were supported by the National Science Foundation (DEB-1716698), the Defense  
222 Advanced Research Projects Agency (Young Faculty Award D16AP00113 and PREEMPT  
223 award D18AC0003), and USDA National Institute of Food and Agriculture (Hatch project  
224 1015891). The content of the information does not necessarily reflect the position or the policy  
225 of the U.S. government, and no official endorsement should be inferred.

226

227 **Acknowledgements**

228 We thank Megan Higgs and anonymous reviewers for helpful comments on this manuscript.

## 229 **References**

- 230 1. Plowright RK, Parrish CR, McCallum H, Hudson PJ, Ko AI, Graham AL, Lloyd-Smith JO.  
231 2017 Pathways to zoonotic spillover. *Nat. Rev. Microbiol.* **15**, 502–510.
- 232 2. Schmidt JP, Park AW, Kramer AM, Han BA, Alexander LW, Drake JM. 2017  
233 Spatiotemporal Fluctuations and Triggers of Ebola Virus Spillover. *Emerg. Infect. Dis.* **23**,  
234 415–422. (doi:10.3201/eid2303.160101)
- 235 3. Hoyer BJ, Munster VJ, Nishiura H, Klaassen M, Fouchier RAM. 2010 Surveillance of Wild  
236 Birds for Avian Influenza Virus. *Emerg. Infect. Dis.* **16**, 1827–1834.  
237 (doi:10.3201/eid1612.100589)
- 238 4. Plowright RK *et al.* 2015 Ecological dynamics of emerging bat virus spillover. *Proc R Soc B*  
239 **282**, 20142124. (doi:10.1098/rspb.2014.2124)
- 240 5. Vergara PM, Saravia-Zepeda A, Castro-Reyes N, Simonetti JA. 2016 Is metapopulation  
241 patch occupancy in nature well predicted by the Levins model? *Popul. Ecol.* , 1–9.  
242 (doi:10.1007/s10144-016-0550-5)
- 243 6. Plowright RK, Foley P, Field HE, Dobson AP, Foley JE, Eby P, Daszak P. 2011 Urban  
244 habituation, ecological connectivity and epidemic dampening: the emergence of Hendra  
245 virus from flying foxes (*Pteropus* spp.). *Proc. R. Soc. B Biol. Sci.* **278**, 3703–3712.  
246 (doi:10.1098/rspb.2011.0522)
- 247 7. Hess G. 1996 Disease in Metapopulation Models: Implications for Conservation. *Ecology*  
248 **77**, 1617–1632. (doi:10.2307/2265556)
- 249 8. Bjørnstad ON, Ims RA, Lambin X. 1999 Spatial population dynamics: analyzing patterns  
250 and processes of population synchrony. *Trends Ecol. Evol.* **14**, 427–432.
- 251 9. Altizer S, Dobson A, Hosseini P, Hudson P, Pascual M, Rohani P. 2006 Seasonality and the  
252 dynamics of infectious diseases. *Ecol. Lett.* **9**, 467–484.
- 253 10. Peel AJ, Pulliam JRC, Luis AD, Plowright RK, O’Shea TJ, Hayman DTS, Wood JLN, Webb  
254 CT, Restif O. 2014 The effect of seasonal birth pulses on pathogen persistence in wild  
255 mammal populations. *Proc. R. Soc. Lond. B Biol. Sci.* **281**, 20132962.  
256 (doi:10.1098/rspb.2013.2962)
- 257 11. Kuiken T, Leighton FA, Fouchier R a. M, LeDuc JW, Peiris JSM, Schudel A, Stöhr K,  
258 Osterhaus ADME. 2005 Pathogen Surveillance in Animals. *Science* **309**, 1680–1681.  
259 (doi:10.1126/science.1113310)
- 260 12. Stallknecht DE. 2007 Impediments to Wildlife Disease Surveillance, Research, and  
261 Diagnostics. In *Wildlife and Emerging Zoonotic Diseases: The Biology, Circumstances and*  
262 *Consequences of Cross-Species Transmission*, pp. 445–461. Springer, Berlin, Heidelberg.  
263 (doi:10.1007/978-3-540-70962-6\_17)

- 264 13. Nusser SM, Clark WR, Otis DL, Huang L. 2008 Sampling Considerations for Disease  
265 Surveillance in Wildlife Populations. *J. Wildl. Manag.* **72**, 52–60.
- 266 14. Venette RC, Moon RD, Hutchison WD. 2002 Strategies and statistics of sampling for rare  
267 individuals. *Annu. Rev. Entomol.* **47**, 143–174.  
268 (doi:10.1146/annurev.ento.47.091201.145147)
- 269 15. Hayman DTS, Suu-Ire R, Breed AC, McEachern JA, Wang L, Wood JLN, Cunningham AA.  
270 2008 Evidence of Henipavirus Infection in West African Fruit Bats. *PLOS ONE* **3**, e2739.  
271 (doi:10.1371/journal.pone.0002739)
- 272 16. Peterson AT. 2006 Ecologic Niche Modeling and Spatial Patterns of Disease Transmission.  
273 *Emerg. Infect. Dis.* **12**, 1822–1826. (doi:10.3201/eid1212.060373)
- 274 17. Wang J-F, Stein A, Gao B-B, Ge Y. 2012 A review of spatial sampling. *Spat. Stat.* **2**, 1–14.  
275 (doi:10.1016/j.spasta.2012.08.001)
- 276 18. Plowright RK, Peel AJ, Streicker DG, Gilbert AT, McCallum H, Wood J, Baker ML, Restif  
277 O. 2016 Transmission or Within-Host Dynamics Driving Pulses of Zoonotic Viruses in  
278 Reservoir–Host Populations. *PLoS Negl. Trop. Dis.* **10**, e0004796.  
279 (doi:10.1371/journal.pntd.0004796)
- 280 19. Restif O *et al.* 2012 Model-guided fieldwork: practical guidelines for multidisciplinary  
281 research on wildlife ecological and epidemiological dynamics. *Ecol. Lett.* **15**, 1083–1094.
- 282 20. Plowright RK, Becker DJ, McCallum H, Manlove KR. 2019 Sampling to elucidate the  
283 dynamics of infections in reservoir hosts. *Philos. Trans. R. Soc. B*  
284 (doi:10.1098/rstb.2018.0336)
- 285 21. Luis AD *et al.* 2013 A comparison of bats and rodents as reservoirs of zoonotic viruses: are  
286 bats special? *Proc R Soc B* **280**, 20122753. (doi:10.1098/rspb.2012.2753)
- 287 22. Olival KJ, Hosseini PR, Zambrana-Torrel C, Ross N, Bogich TL, Daszak P. 2017 Host and  
288 viral traits predict zoonotic spillover from mammals. *Nature* **546**, 646–650.  
289 (doi:10.1038/nature22975)
- 290 23. Amman BR *et al.* 2015 Oral shedding of marburg virus in experimentally infected egyptian  
291 fruit bats (*rousettus aegyptiacus*). *J. Wildl. Dis.* **51**, 113–124. (doi:10.7589/2014-08-198)
- 292 24. Middleton DJ, Morrissy CJ, van der Heide BM, Russell GM, Braun MA, Westbury HA,  
293 Halpin K, Daniels PW. 2007 Experimental Nipah Virus Infection in Pteropid Bats (*Pteropus*  
294 *poliocephalus*). *J. Comp. Pathol.* **136**, 266–272. (doi:10.1016/j.jcpa.2007.03.002)
- 295 25. Amman BR *et al.* 2012 Seasonal Pulses of Marburg Virus Circulation in Juvenile *Rousettus*  
296 *aegyptiacus* Bats Coincide with Periods of Increased Risk of Human Infection. *PLOS*  
297 *Pathog.* **8**, e1002877. (doi:10.1371/journal.ppat.1002877)



- 298 26. McFarlane R, Becker N, Field H. 2011 Investigation of the Climatic and Environmental  
299 Context of Hendra Virus Spillover Events 1994–2010. *PLOS ONE* **6**, e28374.  
300 (doi:10.1371/journal.pone.0028374)
- 301 27. Luby SP *et al.* 2006 Foodborne Transmission of Nipah Virus, Bangladesh. *Emerg. Infect.*  
302 *Dis.* **12**, 1888–1894. (doi:10.3201/eid1212.060732)
- 303 28. Pulliam JRC *et al.* 2012 Agricultural intensification, priming for persistence and the  
304 emergence of Nipah virus: a lethal bat-borne zoonosis. *J. R. Soc. Interface* **9**, 89–101.  
305 (doi:10.1098/rsif.2011.0223)
- 306 29. Glennon EE, Restif O, Sbarbaro SR, Garnier R, Cunningham AA, Suu-Ire RD, Osei-  
307 Amponsah R, Wood JLN, Peel AJ. 2018 Domesticated animals as hosts of henipaviruses and  
308 filoviruses: A systematic review. *Vet. J.* **233**, 25–34. (doi:10.1016/j.tvjl.2017.12.024)
- 309 30. Pourrut X, Kumulungui B, Wittmann T, Moussavou G, Délicat A, Yaba P, Nkoghe D,  
310 Gonzalez J-P, Leroy EM. 2005 The natural history of Ebola virus in Africa. *Microbes Infect.*  
311 **7**, 1005–1014.
- 312 31. Brook CE *et al.* 2019 Disentangling serology to elucidate henipa- and filovirus transmission  
313 in Madagascar fruit bats. *J. Anim. Ecol.* **0**. (doi:10.1111/1365-2656.12985)
- 314 32. Pourrut X, Délicat A, Rollin PE, Ksiazek TG, Gonzalez J-P, Leroy EM. 2007 Spatial and  
315 Temporal Patterns of Zaire ebolavirus Antibody Prevalence in the Possible Reservoir Bat  
316 Species. *J. Infect. Dis.* **196**, S176–S183. (doi:10.1086/520541)
- 317 33. Páez DJ, Giles J, McCallum H, Field H, Jordan D, Peel AJ, Plowright RK. 2017 Conditions  
318 affecting the timing and magnitude of Hendra virus shedding across pteropodid bat  
319 populations in Australia. *Epidemiol. Infect.* , 1–11. (doi:10.1017/S0950268817002138)
- 320 34. Drexler JF *et al.* 2012 Bats host major mammalian paramyxoviruses. *Nat. Commun.* **3**, 796.  
321 (doi:10.1038/ncomms1796)
- 322 35. Han BA, Schmidt JP, Alexander LW, Bowden SE, Hayman DT, Drake JM. 2016  
323 Undiscovered bat hosts of filoviruses. *PLOS Negl Trop Dis* **10**, e0004815.
- 324 36. Schuh AJ *et al.* 2017 Modelling filovirus maintenance in nature by experimental  
325 transmission of Marburg virus between Egyptian rousette bats. *Nat. Commun.* **8**, 14446.
- 326 37. Hayman DTS, Bowen RA, Cryan PM, McCracken GF, O’Shea TJ, Peel AJ, Gilbert A, Webb  
327 CT, Wood JLN. 2013 Ecology of Zoonotic Infectious Diseases in Bats: Current Knowledge  
328 and Future Directions. *Zoonoses Public Health* **60**, 2–21. (doi:10.1111/zph.12000)
- 329 38. Sokolow Susanne H. *et al.* 2019 Ecological interventions to prevent and manage zoonotic  
330 pathogen spillover. *Philos. Trans. R. Soc. B Biol. Sci.* **374**, 20180342.  
331 (doi:10.1098/rstb.2018.0342)

- 332 39. Peel AJ *et al.* 2013 Use of cross-reactive serological assays for detecting novel pathogens in  
333 wildlife: Assessing an appropriate cutoff for henipavirus assays in African bats. *J. Virol.*  
334 *Methods* **193**, 295–303. (doi:10.1016/j.jviromet.2013.06.030)
- 335 40. Gilbert AT *et al.* 2013 Deciphering serology to understand the ecology of infectious diseases  
336 in wildlife. *Ecohealth* **10**, 298–313.
- 337 41. Wacharapluesadee S, Boongird K, Wanghongsa S, Ratanasetyuth N, Supavonwong P,  
338 Saengsen D, Gongal G n., Hemachudha T. 2009 A Longitudinal Study of the Prevalence of  
339 Nipah Virus in Pteropus lylei Bats in Thailand: Evidence for Seasonal Preference in Disease  
340 Transmission. *Vector-Borne Zoonotic Dis.* **10**, 183–190. (doi:10.1089/vbz.2008.0105)
- 341 42. Halpin K *et al.* 2011 Pteropid bats are confirmed as the reservoir hosts of henipaviruses: a  
342 comprehensive experimental study of virus transmission. *Am. J. Trop. Med. Hyg.* **85**, 946–  
343 951. (doi:10.4269/ajtmh.2011.10-0567)
- 344 43. Wood S. 2006 *Generalized additive models: an introduction with R*. CRC press.
- 345 44. Viechtbauer W. 2010 Conducting meta-analyses in R with the metafor package. *J. Stat.*  
346 *Softw.* **36**, 1–48.
- 347 45. Konstantopoulos S. 2011 Fixed effects and variance components estimation in three-level  
348 meta-analysis. *Res. Synth. Methods* **2**, 61–76.
- 349 46. Nakagawa S, Santos ES. 2012 Methodological issues and advances in biological meta-  
350 analysis. *Evol. Ecol.* **26**, 1253–1274.
- 351 47. Michonneau F, Brown JW, Winter DJ. 2016 rotl : an R package to interact with the Open  
352 Tree of Life data. *Methods Ecol. Evol.* (doi:10.1111/2041-210X.12593)
- 353 48. Paradis E, Claude J, Strimmer K. 2004 APE: analyses of phylogenetics and evolution in R  
354 language. *Bioinformatics* **20**, 289–290.
- 355 49. Senior AM, Grueber CE, Kamiya T, Lagisz M, O’Dwyer K, Santos ESA, Nakagawa S. 2016  
356 Heterogeneity in ecological and evolutionary meta-analyses: its magnitude and implications.  
357 *Ecology* **97**, 3293–3299. (doi:10.1002/ecy.1591)
- 358 50. Borenstein M, Hedges LV, Higgins JP, Rothstein HR. 2011 *Introduction to meta-analysis*.  
359 John Wiley & Sons. See  
360 [http://books.google.com/books?hl=en&lr=&id=JQg9jdrq26wC&oi=fnd&pg=PT14&dq=Borenstein+M,+Hedges+L,+Higgins+J,+Rothstein+H+\(2005\).+Comprehensive+Meta-Analysis&ots=VH\\_-OOjzjB&sig=obmoEp98npSeyQvbvsSC\\_jjdPMc](http://books.google.com/books?hl=en&lr=&id=JQg9jdrq26wC&oi=fnd&pg=PT14&dq=Borenstein+M,+Hedges+L,+Higgins+J,+Rothstein+H+(2005).+Comprehensive+Meta-Analysis&ots=VH_-OOjzjB&sig=obmoEp98npSeyQvbvsSC_jjdPMc).  
361  
362
- 363 51. López-López JA, Marín-Martínez F, Sánchez-Meca J, Noortgate W, Viechtbauer W. 2014  
364 Estimation of the predictive power of the model in mixed-effects meta-regression: A  
365 simulation study. *Br. J. Math. Stat. Psychol.* **67**, 30–48.

- 366 52. Changula K *et al.* 2018 Seroprevalence of filovirus infection of Rousettus aegyptiacus bats in  
367 Zambia. *J. Infect. Dis.* **218**, S312–S317.
- 368 53. Pawęska JT, van Vuren PJ, Kemp A, Storm N, Grobbelaar AA, Wiley MR, Palacios G,  
369 Markotter W. 2018 Marburg virus infection in Egyptian rousette bats, South Africa, 2013–  
370 2014. *Emerg. Infect. Dis.* **24**, 1134.
- 371 54. Plowright RK, Field HE, Smith C, Divljan A, Palmer C, Tabor G, Daszak P, Foley JE. 2008  
372 Reproduction and nutritional stress are risk factors for Hendra virus infection in little red  
373 flying foxes (*Pteropus scapulatus*). *Proc. R. Soc. B* **275**, 861–869.  
374 (doi:10.1098/rspb.2007.1260)
- 375 55. Washburne AD, Crowley DE, Becker DJ, Olival KJ, Taylor M, Munster VJ, Plowright RK.  
376 2018 Taxonomic patterns in the zoonotic potential of mammalian viruses. *PeerJ* **6**, e5979.  
377 (doi:10.7717/peerj.5979)
- 378 56. Cressie N, Wikle CK. 2015 *Statistics for Spatio-Temporal Data*. John Wiley & Sons.
- 379 57. Yoccoz NG, Nichols JD, Boulinier T. 2001 Monitoring of biological diversity in space and  
380 time. *Trends Ecol. Evol.* **16**, 446–453.
- 381 58. Urquhart NS, Kincaid TM. 1999 Designs for detecting trend from repeated surveys of  
382 ecological resources. *J. Agric. Biol. Environ. Stat.* , 404–414.
- 383 59. Becker DJ, Crowley DE, Washburne AD, Plowright RK. 2019 Data from: Temporal and  
384 spatial limitations in global surveillance for bat filoviruses and henipaviruses.  
385 (doi:10.5061/dryad.kkwh70s18)
- 386

387 **Tables**

388

389 Table 1. Summary of the temporal and spatial limitations for bat filovirus and henipavirus  
 390 prevalence and seroprevalence data. Some studies had multiple diagnostic methods, sampling  
 391 designs, and reporting methods. Diagnostic mismatch refers to geographic regions (United  
 392 Nations geoscheme) where either PCR or serology have been used (but not together).

|               |          | Longitudinal virus studies | Geographic sampling gaps                      | Diagnostic mismatch                                 | Regions with longitudinal data                                 |
|---------------|----------|----------------------------|-----------------------------------------------|-----------------------------------------------------|----------------------------------------------------------------|
| Filoviruses   | PCR      | 4/19                       | Latin America, Oceania, Southern Africa       | Southern Africa                                     | Central Africa, Eastern Africa                                 |
|               | Serology | 7/25                       | Latin America, Oceania                        |                                                     | Central Africa, Eastern Africa, Middle Africa, Southern Africa |
| Henipaviruses | PCR      | 4/13                       | Eastern Africa, Southern Africa, Eastern Asia | Europe, Eastern Africa, Middle Africa, Eastern Asia | Southeastern Asia, Oceania                                     |
|               | Serology | 5/27                       | Middle Africa, Southern Africa, Europe        |                                                     | Southeastern Asia, Oceania, Eastern Africa                     |

393

394

395 **Figures and legends**

396

397 Figure 1. Top: Conceptual schematic of how different sampling designs and reporting practices  
398 (colored points and lines) capture the underlying temporal dynamics of infection (black line),  
399 followed by observed proportions for studies of bat filoviruses and henipaviruses (grey shows  
400 the proportion of studies not reporting these data). Bottom: Countries sampled for bat filoviruses  
401 and henipaviruses and where wild bats have been found positive through PCR or serology.  
402

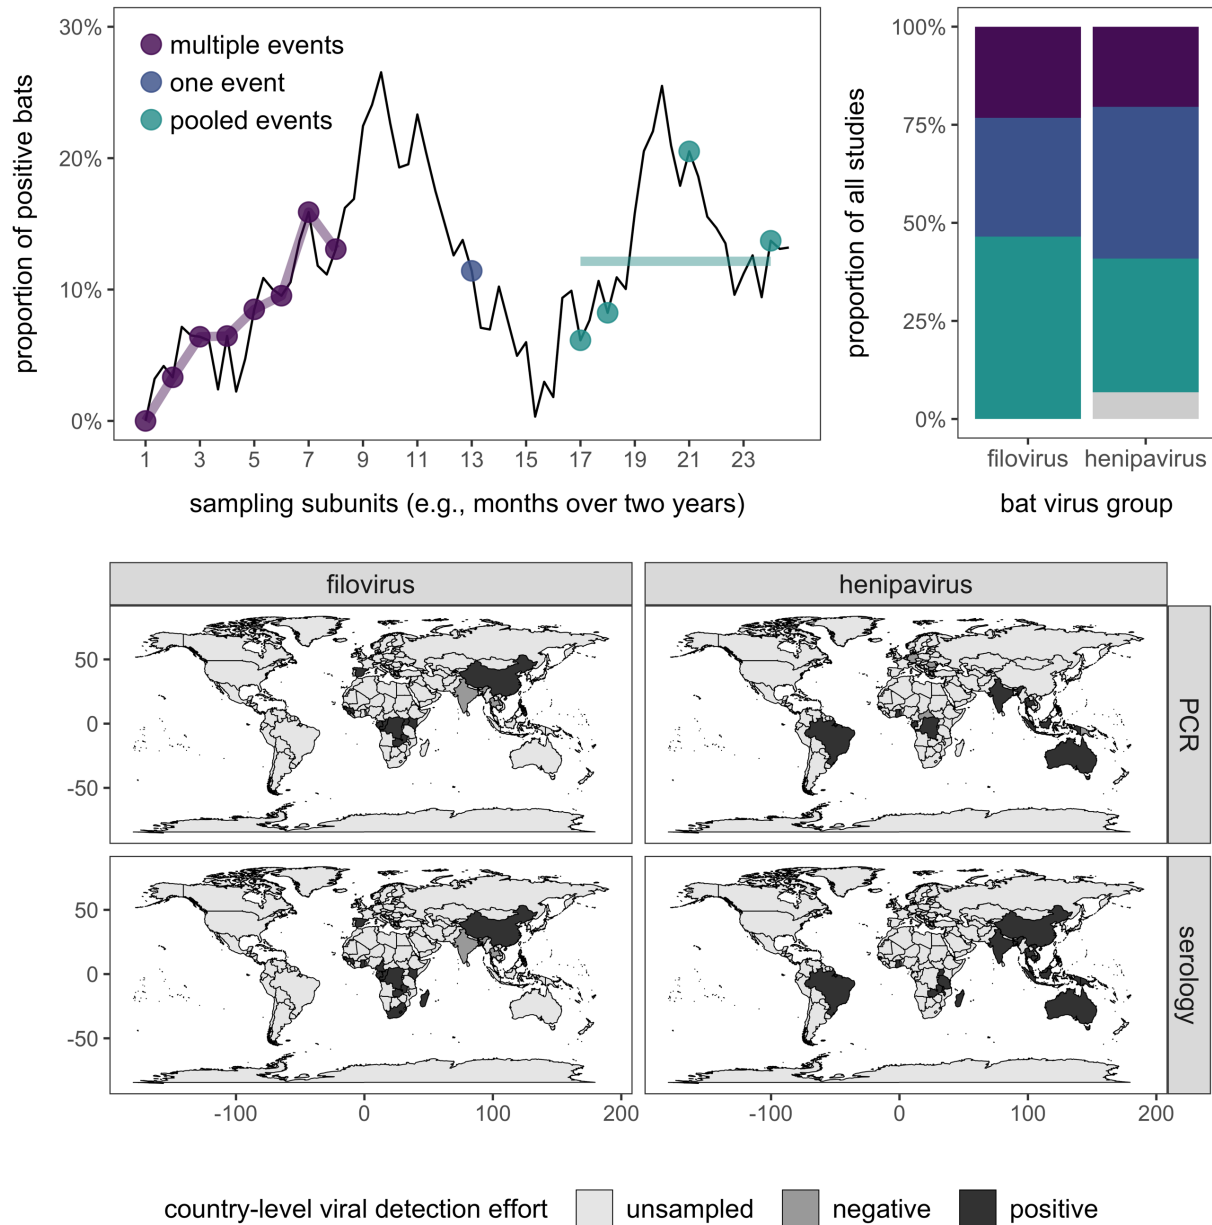

403

404



405 Figure 2. Top: Influence of sampling designs and reporting practices on virus detection  
 406 estimates. Points show proportions of positive bats per subunit; lines and diamonds display back-  
 407 transformed predicted means and 95% confidence intervals from the MEM. Bottom:  
 408 Spatiotemporal variation in viral detection estimates for longitudinal studies. Points represent  
 409 each subunit virus detection estimate and are colored by locations and shaped by month.  
 410

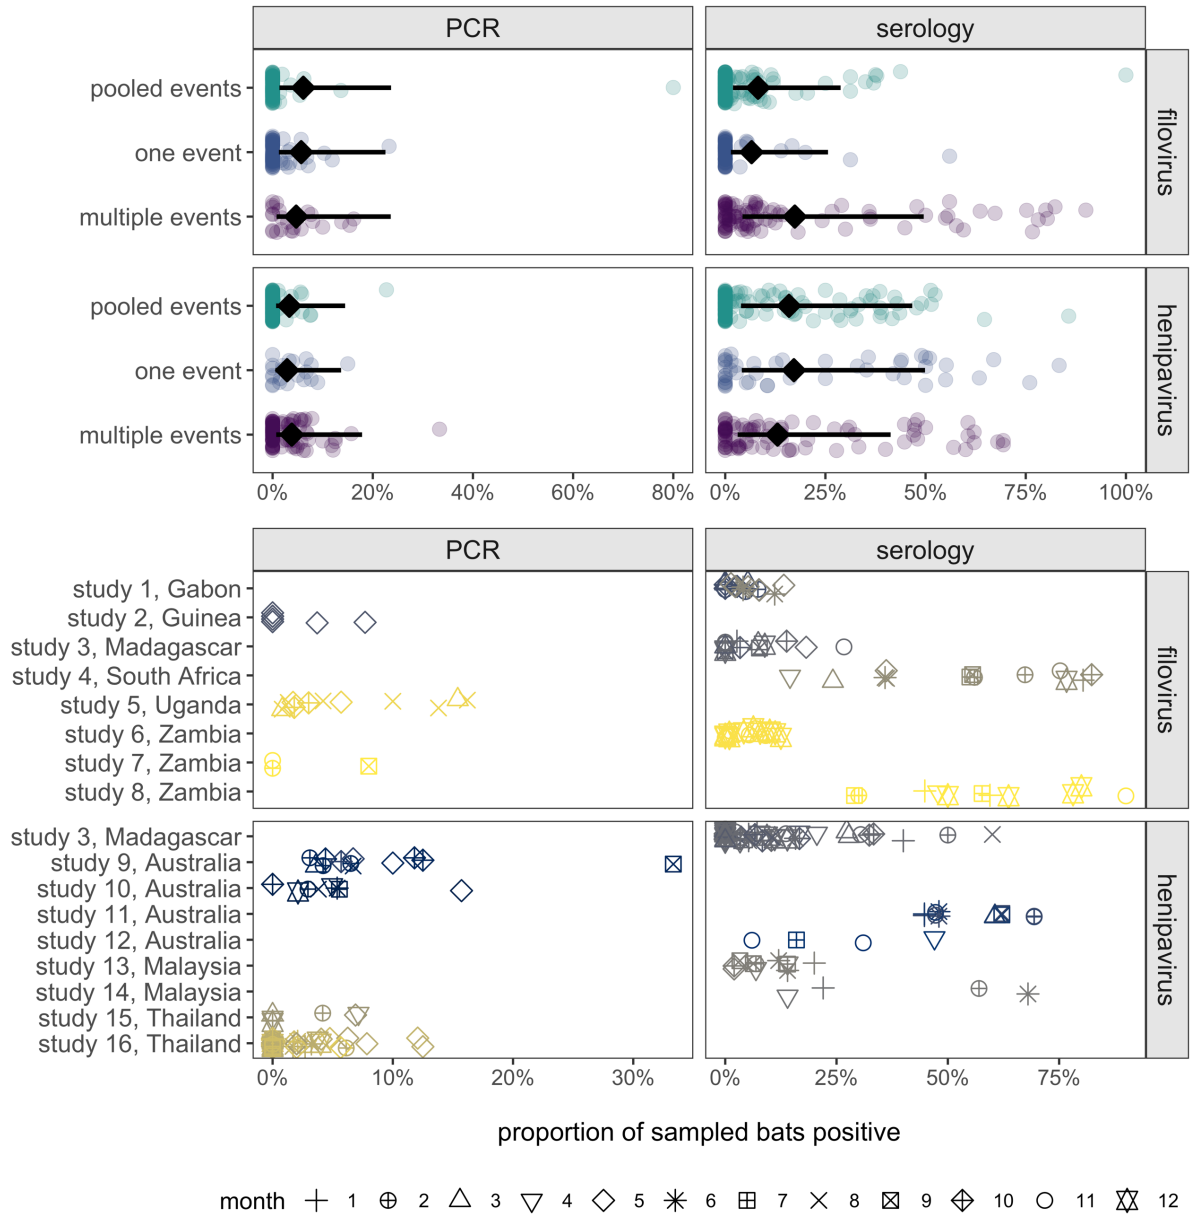

411
