# Supplementary material for: Temporal and spatial limitations in global surveillance for bat filoviruses and henipaviruses
Source: bioRxiv or medRxiv preprint supplement (doi:10.1101/674655), 2019-09-30
Supplement: Supplementary file [file media-1.pdf]

**Temporal and spatial limitations in global surveillance for bat filoviruses and  
henipaviruses: Online Appendix**

Daniel J. Becker, Daniel E. Crowley, Alex D. Washburne, Raina K. Plowright

**S1. Systematic search**

**S2. Full reference list**

**S3. Bat phylogeny**

**S4. Post-hoc sampling design analysis**

## S1. Systematic search

Figure S1. The data collection and inclusion process for studies of wild bat filovirus and henipavirus prevalence and seroprevalence (PRISMA diagram). Searches used the following string: (bat\* OR Chiroptera\*) AND (filovirus OR henipavirus OR "Hendra virus" OR "Nipah virus" OR "Ebola virus" OR "Marburg virus" OR ebolavirus OR marburgvirus). Searches were run during October 2017. Publications were excluded if they did not assess filovirus or henipavirus prevalence or seroprevalence in wild bats or were in languages other than English.

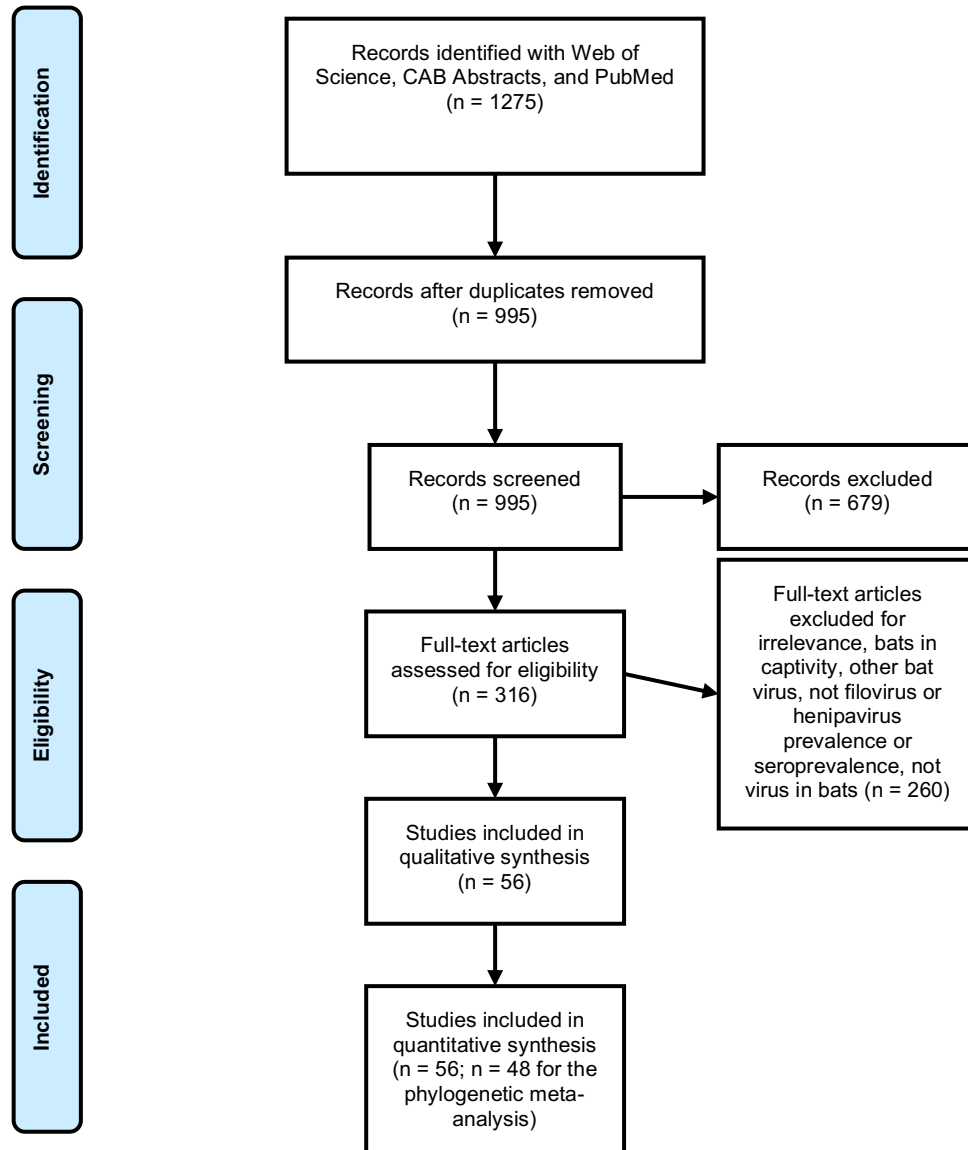

## S2. Full reference list

1. Amman, Brian R., et al. "Seasonal pulses of Marburg virus circulation in juvenile *Rousettus aegyptiacus* bats coincide with periods of increased risk of human infection." *PLoS Pathogens* 8.10 (2012): e1002877.
2. de Araujo, Jansen, et al. "Antibodies against Henipa-like viruses in Brazilian bats." *Vector-Borne and Zoonotic Diseases* 17.4 (2017): 271-274.
3. Breed, Andrew C., et al. "Evidence of endemic Hendra virus infection in flying-foxes (*Pteropus conspicillatus*)—implications for disease risk management." *PLoS One* 6.12 (2011): e28816.
4. Breed, Andrew C., et al. "Prevalence of henipavirus and rubulavirus antibodies in pteropid bats, Papua New Guinea." *Emerging infectious diseases* 16.12 (2010): 1997.
5. Breed, Andrew C., et al. "The distribution of henipaviruses in Southeast Asia and Australasia: is Wallace's line a barrier to Nipah virus?." *PloS one* 8.4 (2013): e61316.
6. Breman, Joel G., et al. "A search for Ebola virus in animals in the Democratic Republic of the Congo and Cameroon: ecologic, virologic, and serologic surveys, 1979–1980." *The Journal of infectious diseases* 179.Supplement\_1 (1999): S139-S147.
7. Drexler, Jan Felix, et al. "Bats host major mammalian paramyxoviruses." *Nature communications* 3 (2012): 796.
8. Drexler, Jan Felix, et al. "Henipavirus RNA in African bats." *PloS one* 4.7 (2009): e6367.
9. Epstein, Jonathan H., et al. "Feral cats and risk for Nipah virus transmission." *Emerging infectious diseases* 12.7 (2006): 1178.
10. Epstein, Jonathan H., et al. "Henipavirus infection in fruit bats (*Pteropus giganteus*), India." *Emerging infectious diseases* 14.8 (2008): 1309.
11. Field, Hume, et al. "Hendra virus infection dynamics in Australian fruit bats." *PloS one* 6.12 (2011): e28678.
12. Goldspink, Lauren K., et al. "Natural Hendra virus infection in flying-foxes-tissue tropism and risk factors." *PLoS One* 10.6 (2015): e0128835.
13. Hasebe, Futoshi, et al. "Serologic evidence of nipah virus infection in bats, Vietnam." *Emerging infectious diseases* 18.3 (2012): 536.
14. Hayman, David TS, et al. "Ebola virus antibodies in fruit bats, Ghana, West Africa." *Emerging infectious diseases* 18.7 (2012): 1207.
15. Hayman, David TS, et al. "Evidence of henipavirus infection in West African fruit bats." *PloS one* 3.7 (2008): e2739.

16. Hayman, David TS, et al. "Long-term survival of an urban fruit bat seropositive for Ebola and Lagos bat viruses." *PloS one* 5.8 (2010): e11978.
17. He, Biao, et al. "Filovirus RNA in fruit bats, China." *Emerging infectious diseases* 21.9 (2015): 1675.
18. Hsu, Vincent P., et al. "Nipah virus encephalitis reemergence, Bangladesh." *Emerging infectious diseases* 10.12 (2004): 2082.
19. Iehlé, Catherine, Girard Razafitrimo, and Josette Razainirina. "Henipavirus and Tioman virus antibodies in pteropodid bats, Madagascar." *Emerging infectious diseases* 13.1 (2007): 159.
20. Jayme, Sarah I., et al. "Molecular evidence of Ebola Reston virus infection in Philippine bats." *Virology journal* 12.1 (2015): 107.
21. Kashiwazaki, Yoshihito, et al. "A solid-phase blocking ELISA for detection of antibodies to Nipah virus." *Journal of virological methods* 121.2 (2004): 259-261.
22. Kuzmin, Ivan V., et al. "Marburg virus in fruit bat, Kenya." *Emerging infectious diseases* 16.2 (2010): 352.
23. Leirs, Herwig, et al. "Search for the Ebola virus reservoir in Kikwit, Democratic Republic of the Congo: reflections on a vertebrate collection." *The Journal of infectious diseases* 179.Supplement\_1 (1999): S155-S163.
24. Leroy, Eric M., et al. "Fruit bats as reservoirs of Ebola virus." *Nature* 438.7068 (2005): 575.
25. Li, Yan, et al. "Antibodies to Nipah or Nipah-like viruses in bats, China." *Emerging infectious diseases* 14.12 (2008): 1974.
26. Maganga, Gael D., et al. "Is Marburg virus enzootic in Gabon?." *The Journal of infectious diseases* 204.suppl\_3 (2011): S800-S803.
27. Negrodo, Ana, et al. "Discovery of an ebolavirus-like filovirus in Europe." *PLoS pathogens* 7.10 (2011): e1002304.
28. Ogawa, Hirohito, et al. "Seroepidemiological prevalence of multiple species of filoviruses in fruit bats (*Eidolon helvum*) migrating in Africa." *The Journal of infectious diseases* 212.suppl\_2 (2015): S101-S108.
29. Olival, Kevin J., et al. "Ebola virus antibodies in fruit bats, Bangladesh." *Emerging infectious diseases* 19.2 (2013): 270.
30. Olson, James G., et al. "Antibodies to Nipah-like virus in bats (*Pteropus lylei*), Cambodia." *Emerging infectious diseases* 8.9 (2002): 987.

31. Peel, Alison J., et al. "Continent-wide panmixia of an African fruit bat facilitates transmission of potentially zoonotic viruses." *Nature communications* 4 (2013): 2770.
32. Peel, Alison J., et al. "Henipavirus neutralising antibodies in an isolated island population of African fruit bats." *PloS one* 7.1 (2012): e30346.
33. Plowright, Raina K., et al. "Reproduction and nutritional stress are risk factors for Hendra virus infection in little red flying foxes (*Pteropus scapulatus*)." *Proceedings of the Royal Society B: Biological Sciences* 275.1636 (2008): 861-869.
34. Pourrut, Xavier, et al. "Large serological survey showing cocirculation of Ebola and Marburg viruses in Gabonese bat populations, and a high seroprevalence of both viruses in *Rousettus aegyptiacus*." *BMC infectious diseases* 9.1 (2009): 159.
35. Pourrut, Xavier, et al. "Spatial and temporal patterns of Zaire ebolavirus antibody prevalence in the possible reservoir bat species." *The Journal of infectious diseases* 196.Supplement\_2 (2007): S176-S183.
36. Pulliam, Juliet RC, et al. "Agricultural intensification, priming for persistence and the emergence of Nipah virus: a lethal bat-borne zoonosis." *Journal of the Royal Society Interface* 9.66 (2011): 89-101.
37. Rahman, Sohayati A., et al. "Risk factors for Nipah virus infection among pteropid bats, Peninsular Malaysia." *Emerging infectious diseases* 19.1 (2013): 51.
38. Reynes, Jean-Marc, et al. "Nipah virus in Lyle's flying foxes, Cambodia." *Emerging infectious diseases* 11.7 (2005): 1042.
39. Saéz, Almudena Marí, et al. "Investigating the zoonotic origin of the West African Ebola epidemic." *EMBO molecular medicine* 7.1 (2015): 17-23.
40. Sendow, Indrawati, Hume Ernest Field, and John Curran. "Henipavirus in *Pteropus vampyrus* bats, Indonesia." *Emerging infectious diseases* 12.4 (2006): 711.
41. Sendow, Indrawati, et al. "Nipah virus in the fruit bat *Pteropus vampyrus* in Sumatera, Indonesia." *PLoS One* 8.7 (2013): e69544.
42. Sendow, I., et al. "Screening for Nipah virus infection in West Kalimantan province, Indonesia." *Zoonoses and public health* 57.7-8 (2010): 499-503.
43. Shirai, Junsuke, et al. "Nipah virus survey of flying foxes in Malaysia." *Japan Agricultural Research Quarterly: JARQ* 41.1 (2007): 69-78.
44. Swanepoel, Robert, et al. "Studies of reservoir hosts for Marburg virus." *Emerging infectious diseases* 13.12 (2007): 1847.
45. Taniguchi, Satoshi, et al. "Reston Ebolavirus antibodies in bats, the Philippines." *Emerging infectious diseases* 17.8 (2011): 1559.

46. Towner, Jonathan S., et al. "Isolation of genetically diverse Marburg viruses from Egyptian fruit bats." *PLoS pathogens* 5.7 (2009): e1000536.
47. Towner, Jonathan S., et al. "Marburg virus infection detected in a common African bat." *PloS one* 2.8 (2007): e764.
48. Wacharapluesadee, Supaporn, et al. "A longitudinal study of the prevalence of Nipah virus in *Pteropus lylei* bats in Thailand: evidence for seasonal preference in disease transmission." *Vector-Borne and Zoonotic Diseases* 10.2 (2010): 183-190.
49. Wacharapluesadee, Supaporn, et al. "Bat Nipah virus, Thailand." *Emerging infectious diseases* 11.12 (2005): 1949.
50. Wacharapluesadee, Supaporn, et al. "Molecular characterization of Nipah virus from *Pteropus hypomelanus* in Southern Thailand." *Virology journal* 13.1 (2016): 53.
51. Wacharapluesadee, Supaporn, et al. "Surveillance for Ebola virus in wildlife, Thailand." *Emerging infectious diseases* 21.12 (2015): 2271.
52. Yadav, Pragya D., et al. "Detection of Nipah virus RNA in fruit bat (*Pteropus giganteus*) from India." *The American journal of tropical medicine and hygiene* 87.3 (2012): 576-578.
53. Yang, Xing-Lou, et al. "Genetically diverse filoviruses in *Rousettus* and *Eonycteris* spp. bats, China, 2009 and 2015." *Emerging infectious diseases* 23.3 (2017): 482.
54. Yob, J. Mohd, et al. "Nipah virus infection in bats (order Chiroptera) in peninsular Malaysia." *Emerging infectious diseases* 7.3 (2001): 439.
55. Young, Peter L., et al. "Serologic evidence for the presence in *Pteropus* bats of a paramyxovirus related to equine morbillivirus." *Emerging infectious diseases* 2.3 (1996): 239.
56. Yuan, Junfa, et al. "Serological evidence of ebolavirus infection in bats, China." *Virology journal* 9.1 (2012): 236.



1. Michonneau F, Brown JW, Winter DJ. rotl : an R package to interact with the Open Tree of Life data. Fitzjohn R, editor. *Methods in Ecology and Evolution* [Internet]. 2016 Jul [cited 2016 Jul 30]; Available from: <http://doi.wiley.com/10.1111/2041-210X.12593>
2. Paradis E, Claude J, Strimmer K. APE: analyses of phylogenetics and evolution in R language. *Bioinformatics*. 2004;20(2):289–290.
3. Hinchliff CE, Smith SA, Allman JF, Burleigh JG, Chaudhary R, Coghill LM, et al. Synthesis of phylogeny and taxonomy into a comprehensive tree of life. *PNAS*. 2015 Sep 18;201423041.



#### S4. Post-hoc sampling design analysis

Table S1. Post-hoc analysis for the significant interaction between sampling design, outcome (prevalence or seroprevalence), and viral taxa. Mixed effects models with the same random effects as in the full model were fit to each virus–outcome dataset (filovirus prevalence=129, filovirus seroprevalence=174, henipavirus prevalence=217, henipavirus seroprevalence=210). Effect size and statistical significance were assessed using Wald-type tests for sampling design.

| <b>Data subset</b>         | <b><math>Q_2</math></b> | <b><math>p</math></b> |
|----------------------------|-------------------------|-----------------------|
| Filovirus prevalence       | 0.12                    | 0.94                  |
| Filovirus seroprevalence   | 11.53                   | 0.003                 |
| Henipavirus prevalence     | 0.98                    | 0.61                  |
| Henipavirus seroprevalence | 3.41                    | 0.18                  |
